# Supplementary material for: Insights into the dissociative ionization of glycine by PEPICO experiments
Source: Royal Society of Chemistry journal article supplement (doi:10.1039/c8cp03473g), 2018-01-01
Supplement: c8cp03473g1.pdf [file c8cp03473g1.pdf]

## SUPPLEMENTARY MATERIAL

### Insights in the dissociative ionization of glycine by PEPICO experiments

J. Chiarinelli, P. Bolognesi, A. Domaracka, P. Rousseau, M.C. Castrovilli, R. Richter, S. Chatterjee, F. Wang, L. Avaldi

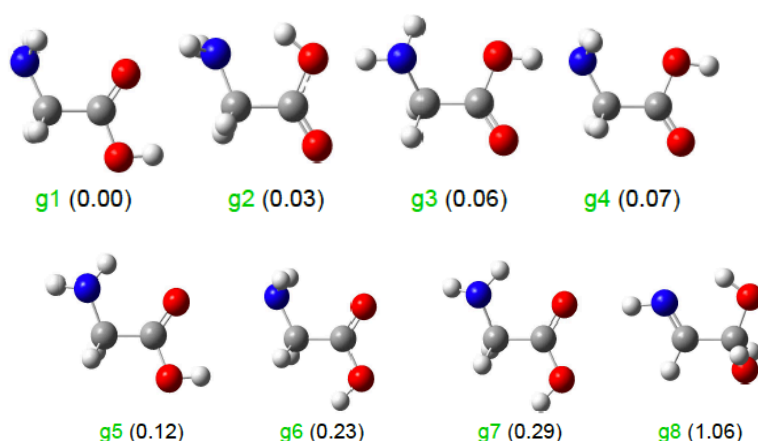

Figure 1: The structure of the eight conformers of neutral glycine. The number in brackets are the energy (eV) of each structure relative to most stable conformer (g1) calculated at the B3LYP/6-311++G(d,p) level <sup>32</sup>.

### Calculations of the outer valence ionization energies (eV) of glycine.

Table 1: Outer valence ionization energies (eV) of glycine calculated using the OVGf models, for conformers g1-g4.

| Orbital     | Conformer g1<br>pole strength | Conformer g2<br>(pole strength) | Conformer g3<br>(pole strength) | Conformer g4<br>(pole strength) |
|-------------|-------------------------------|---------------------------------|---------------------------------|---------------------------------|
| 16a' (HOMO) | 10.0(0.93)                    | 10.0(0.91)                      | 9.70(0.91)                      | 10.0(0.91)                      |
| 15a'        | 11.4(0.91)                    | 11.4(0.91)                      | 12.3(0.90)                      | 11.7(0.90)                      |
| 4a''        | 12.4(0.91)                    | 12.3(0.90)                      | 11.9(0.91)                      | 11.5(0.91)                      |
| 3a''        | 13.6(0.90)                    | 13.9(0.92)                      | 13.7(0.92)                      | 13.9(0.92)                      |
| 14a'        | 14.8(0.92)                    | 14.7(0.91)                      | 14.6(0.92)                      | 13.7(0.91)                      |
| 13a'        | 15.1(0.92)                    | 15.1(0.90)                      | 14.9(0.92)                      | 15.4(0.91)                      |
| 2a''        | 15.8(0.91)                    | 15.8(0.90)                      | 15.8(0.90)                      | 15.8(0.91)                      |
| 12a'        | 17.7(0.91)                    | 16.7(0.91)                      | 17.3(0.90)                      | 16.7(0.91)                      |
| 11a'        | 17.2(0.90)                    | 17.9(0.91)                      | 17.8(0.91)                      | 18.0(0.90)                      |
| 1a''        | 17.7(0.91)                    | 18.3(0.90)                      | 17.6(0.91)                      | 18.8(0.91)                      |
